# Supplementary material for: Gingerol-loaded hollow manganese dioxide nanoparticles attenuate intervertebral disc oxidative stress
Source: Royal Society of Chemistry journal article supplement (doi:10.1039/d6ra00597g), 2026-05-22
Supplement: d6ra00597g1.pdf [file d6ra00597g1.pdf]

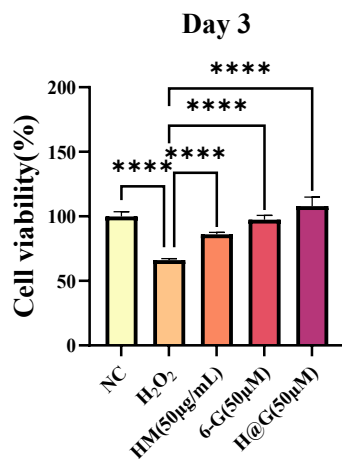

**Supplementary Figure 1.** Cytoprotective effect of different treatments against H<sub>2</sub>O<sub>2</sub>-induced injury in nucleus pulposus cells at day 3.

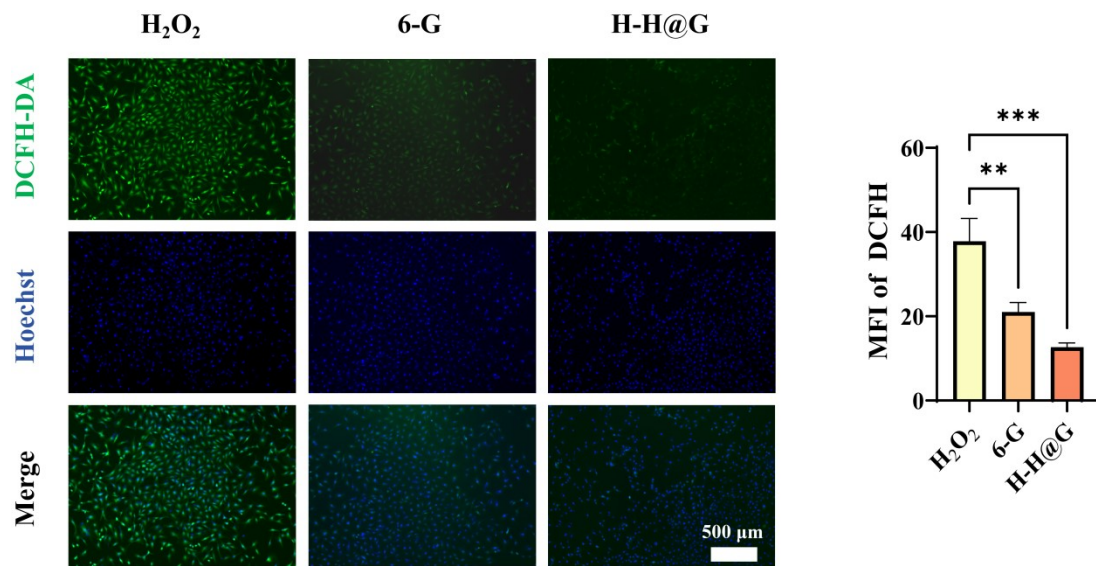

**Supplementary Figure 2.** Comparison of ROS-scavenging capacity between free 6-gingerol and H@G in  $H_2O_2$ -treated NPCs.

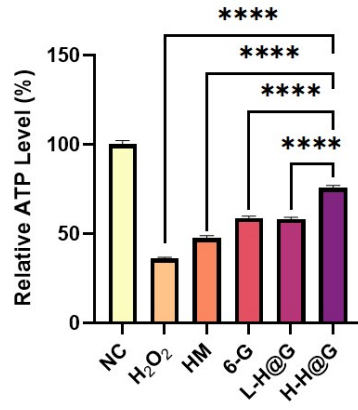

**Supplementary Figure 3.**Effect of H@G on intracellular ATP levels in H<sub>2</sub>O<sub>2</sub>-treated NPCs.
